# Supplementary material for: Polystyrenes containing flexible alkylsulfonated side chains as a proton exchange membrane for fuel cell application
Source: Royal Society of Chemistry journal article supplement (doi:10.1039/c2py20552a), 2012-01-01
Supplement: c2py20552a.pdf [file c2py20552a.pdf]

## Electronic Supplementary Information

### Polystyrene containing flexible alkylsulfonated side chain as a proton exchange membrane for fuel cell application

Li Sheng,<sup>a</sup> Tomoya Higashihara,<sup>\*a</sup> Satoshi Nakazawa,<sup>b</sup> Mitsuru Ueda<sup>\*a</sup>

<sup>a</sup> Department of Organic and Polymeric Materials, Graduate School of Science and Engineering, Tokyo Institute of Technology, 2-12-1 O-okayama, Meguro-ku, Tokyo 152-8552, Japan

<sup>b</sup> Higashifuji Technical Center, Toyota Motor Corporation, 1200 Mishuku, Susono, Shizuoka 410-1193, Japan

#### 1. <sup>1</sup>H NMR spectra of PBOS<sub>3</sub>-*r*-PVP<sub>7</sub> and PBOS<sub>4</sub>-*r*-PVP<sub>6</sub>

The chemical structure of the intermediate polymers, PBOS<sub>3</sub>-*r*-PVP<sub>7</sub> and PBOS<sub>4</sub>-*r*-PVP<sub>6</sub> were confirmed by <sup>1</sup>H NMR. Fig.S1 shows the <sup>1</sup>H NMR spectra of PBOS<sub>3</sub>-*r*-PVP<sub>7</sub> and PBOS<sub>4</sub>-*r*-PVP<sub>6</sub>. The characteristic peaks of methyl protons at  $\delta = 0.91$  and methylene protons next to the ether group at  $\delta = 3.86$  were observed in both PBOS<sub>3</sub>-*r*-PVP<sub>7</sub> and PBOS<sub>4</sub>-*r*-PVP<sub>6</sub>.

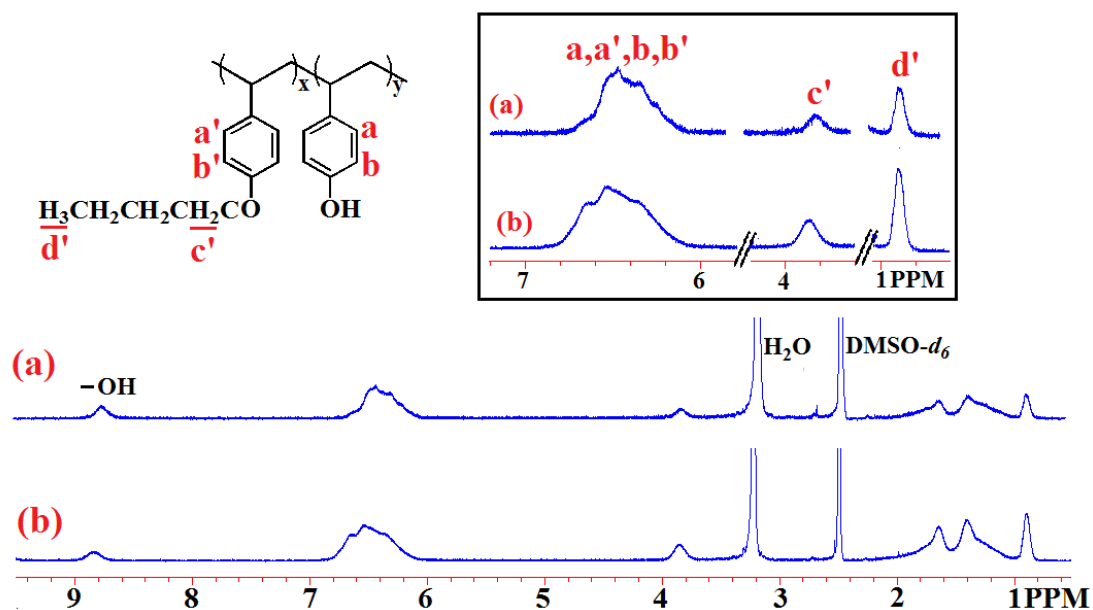

Fig. S1. <sup>1</sup>H NMR spectra of PBOS<sub>3</sub>-*r*-PVP<sub>7</sub> (a) and PBOS<sub>4</sub>-*r*-PVP<sub>6</sub> (b).

## 2. $^1\text{H}$ NMR spectra of $\text{PBOS}_3\text{-}r\text{-PSBOS}_7$ and $\text{PBOS}_4\text{-}r\text{-PSBOS}_6$

The structure of the synthesized  $\text{PBOS}_3\text{-}r\text{-PSBOS}_7$  and  $\text{PBOS}_4\text{-}r\text{-PSBOS}_6$  were also confirmed by  $^1\text{H}$  NMR. The characteristic methyl protons next to the sodium sulfonate at  $\delta = 2.59$  and the hydroxyl protons completely disappear (Fig. S2).

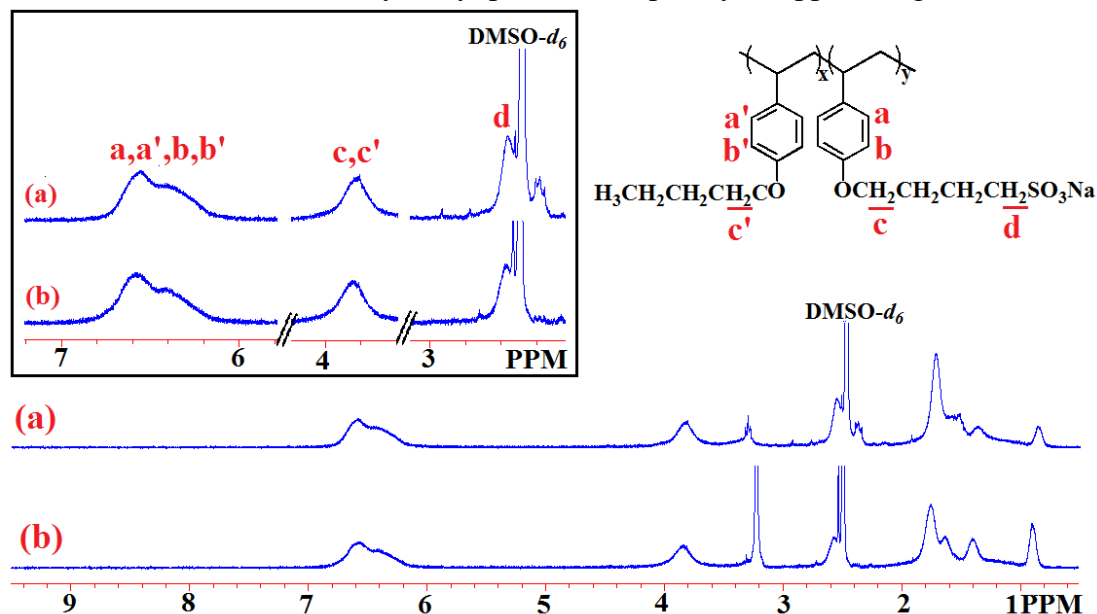

**Fig. S2.**  $^1\text{H}$  NMR spectra of  $\text{PBOS}_3\text{-}r\text{-PSBOS}_7$  and  $\text{PBOS}_4\text{-}r\text{-PSBOS}_6$ .

## 3. FT-IR spectra of $\text{PBOS}_3\text{-}r\text{-PSBOS}_7$ and $\text{PBOS}_4\text{-}r\text{-PSBOS}_6$

The IR spectra of  $\text{PBOS}_3\text{-}r\text{-PSBOS}_7$  and  $\text{PBOS}_4\text{-}r\text{-PSBOS}_6$  exhibit two characteristic absorptions at  $1238$  and  $1045\text{ cm}^{-1}$  corresponding to the symmetric and asymmetric stretching of the sodium sulfonate groups, respectively (Fig. S3).

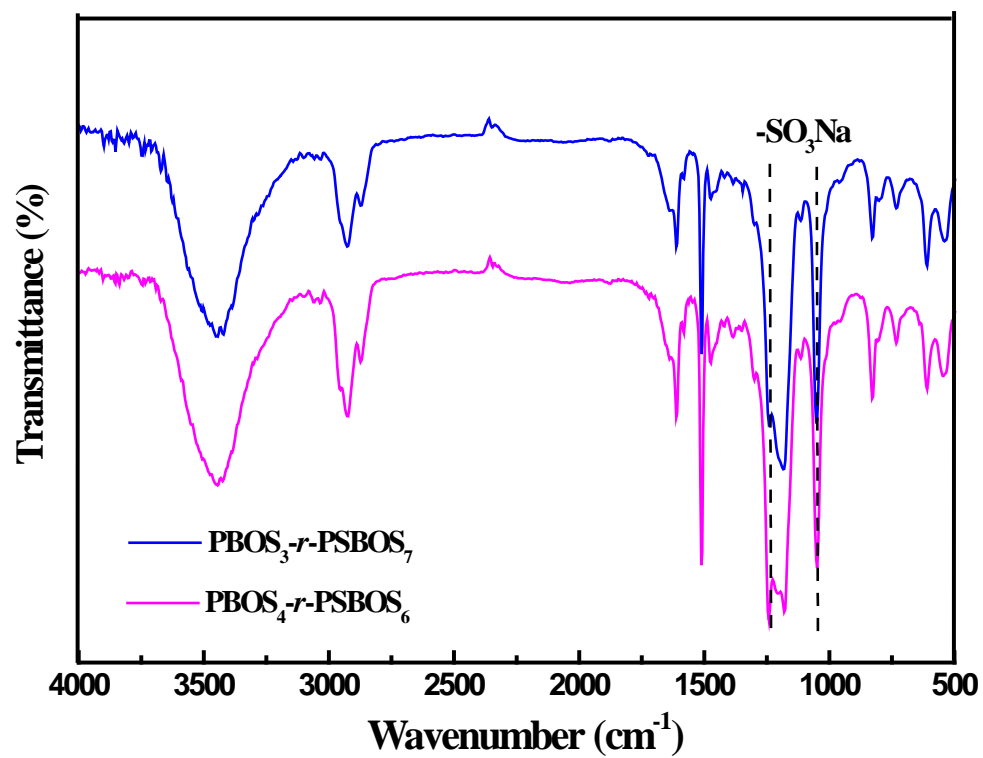

**Fig. S3.** FT-IR spectra of PBOS<sub>3</sub>-*r*-PSBOS<sub>7</sub> and PBOS<sub>4</sub>-*r*-PSBOS<sub>6</sub> (in sodium form).
